# Supplementary material
Source: MDPI journal article supplement (https://www.mdpi.com/2073-4352/13/2/261)
Supplement: s1 [file s1]

## Supporting information

### The crystal structure of calcium sebacate by X-ray powder diffraction data

Mattia Lopresti<sup>1</sup>, Marco Milanese<sup>1</sup>, Luca Palin<sup>1,2\*</sup>

<sup>1</sup> Università del Piemonte Orientale, Dipartimento di Scienze e Innovazione Tecnologica, Viale T. Michel 11, 15121 Alessandria, Italy

<sup>2</sup> Nova Res s.r.l., Via D. Bello 3, 28100 Novara, Italy

e-mail corresponding author: luca.palin@uniupo.it

#### Crystallographic data

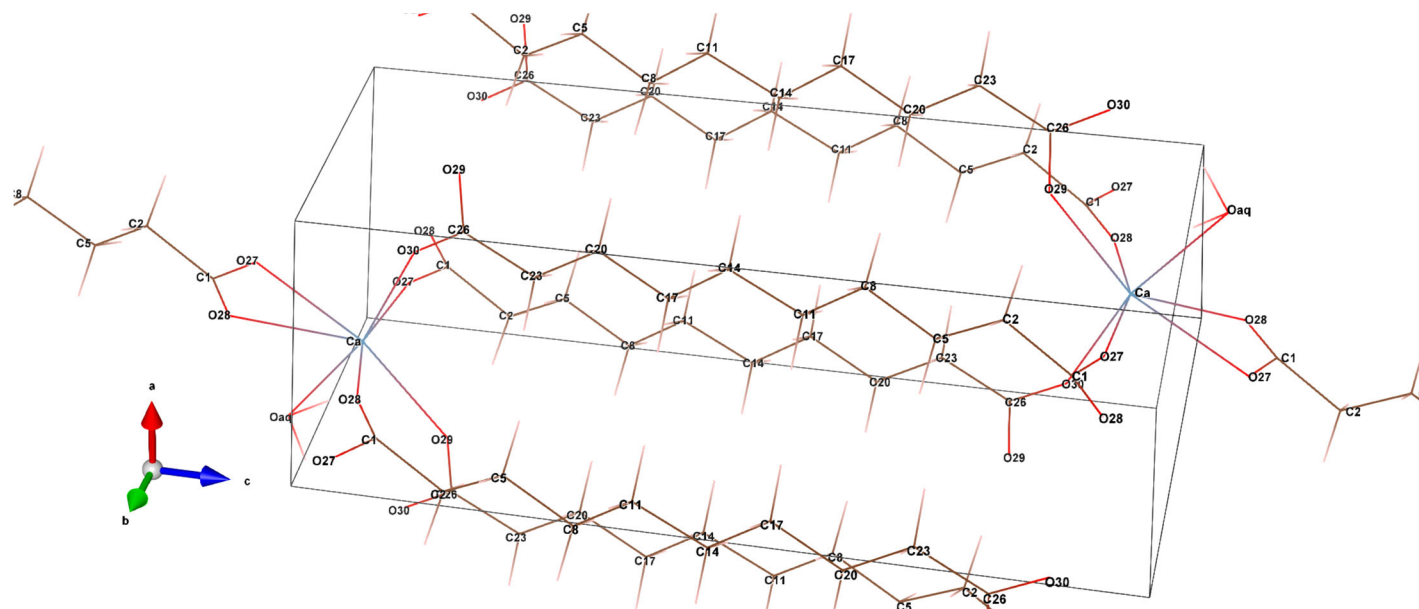

**Figure S1.** Plot of the calcium sebacate structure with atom labels.

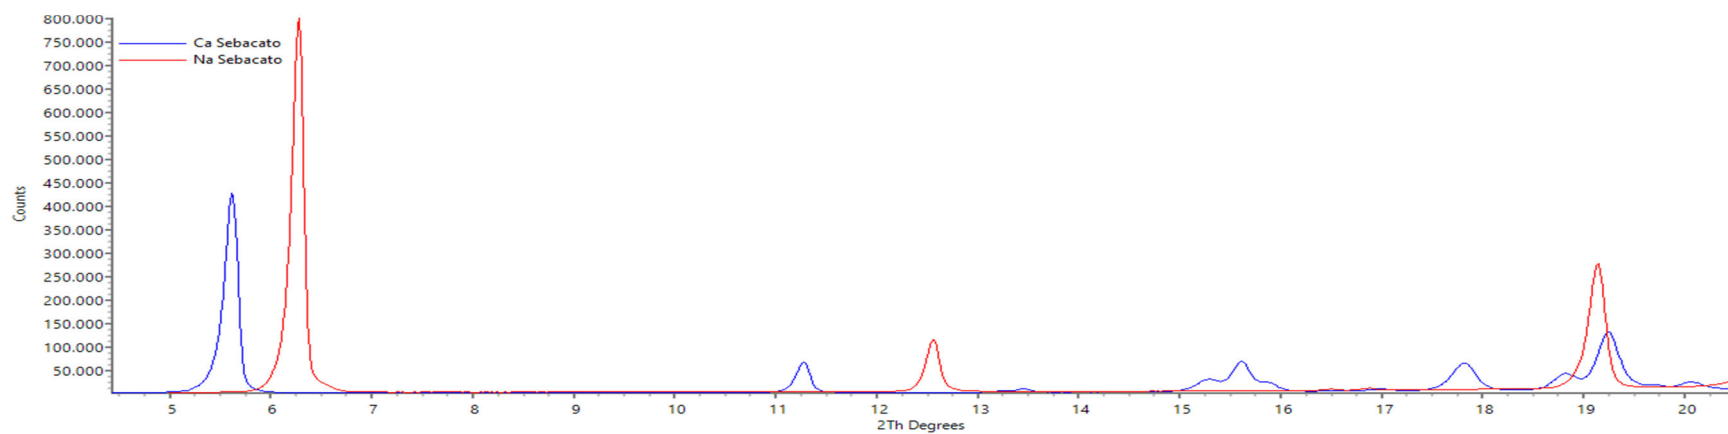

**Figure S2.** Plot of the XRPD of calcium sebacate vs sodium sebacate

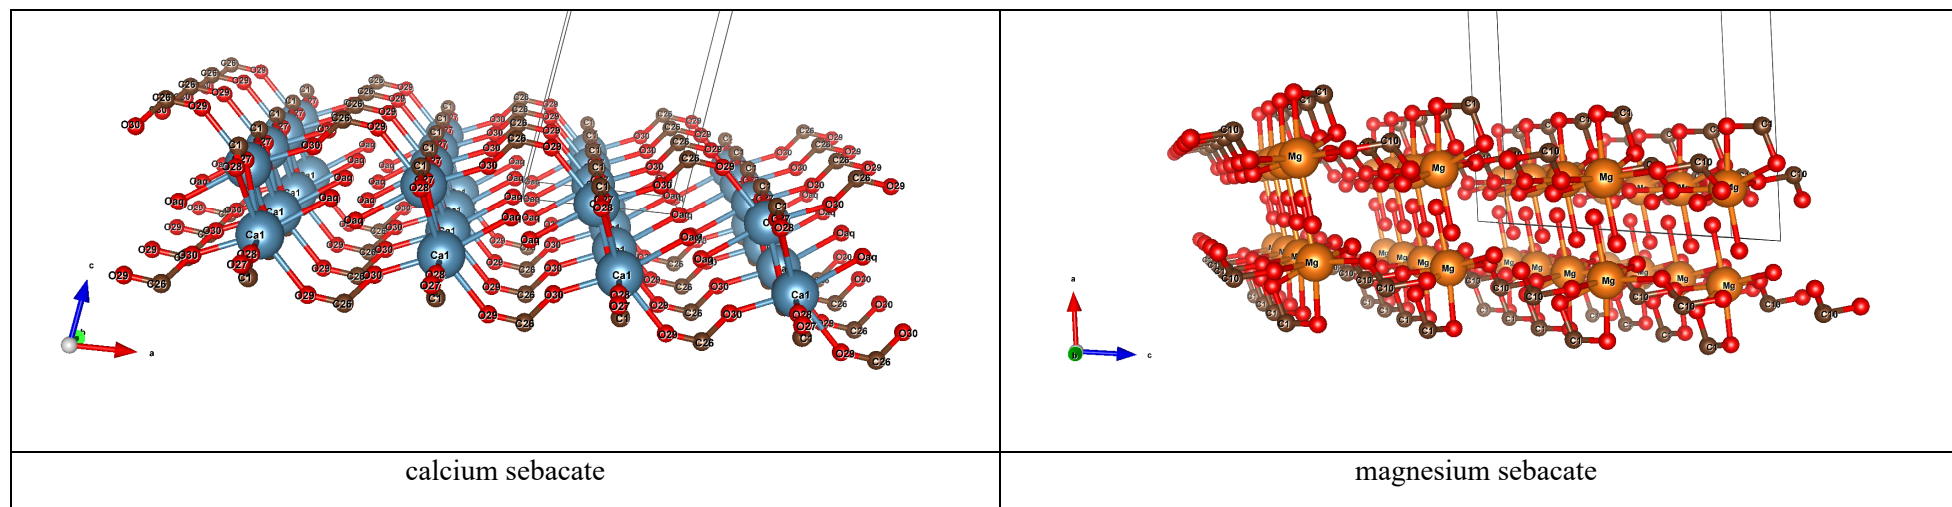

**Figure S3.** Details of Ca coordination and Mg coordination in calcium sebacate vs magnesium sebacate.

**Table S1.** Crystal data and structure refinement for calcium sebacate.

|                                    |                  |  |                                                  |                  |
|------------------------------------|------------------|--|--------------------------------------------------|------------------|
| Compound                           | Calcium sebacate |  |                                                  |                  |
| Chemical formula                   | CaC10H18O5       |  | Z                                                | 2                |
| Formula weight/g·mol <sup>-1</sup> | 258.32           |  | Z'                                               | 1                |
| Crystal system                     | triclinic        |  | T/K                                              | 293(2)           |
| Space group                        | P-1              |  | $\lambda_{\text{Cu}}/\text{\AA}$                 | 1.5406           |
| a/ $\text{\AA}$                    | 5.8633(4)        |  | $\rho_{\text{calc}}/\text{g}\cdot\text{cm}^{-3}$ | 1.378            |
| b/ $\text{\AA}$                    | 6.8363(4)        |  | $\mu/\text{cm}^{-1}$                             | 44.106           |
| c/ $\text{\AA}$                    | 16.059(1)        |  | 2 $\theta$ range/ $^{\circ}$                     | 4-126 $^{\circ}$ |
| $\alpha/^{\circ}$                  | 79.34(1)         |  | Rp                                               | 5.21             |
| $\beta/^{\circ}$                   | 81.318(9)        |  | Rwp                                              | 8.832            |
| $\gamma/^{\circ}$                  | 82.834(6)        |  | $\chi^2$                                         | 14.065           |
| V/ $\text{\AA}^3$                  | 622.2(1)         |  | CCDC number                                      | 2225055          |

**Table S2.** Atomic table for the structure of calcium sebacate.

| Site | Occupancy | X        | Y          | Z         | Biso     | Type |
|------|-----------|----------|------------|-----------|----------|------|
| C1   | 1         | 0.368(2) | 0.1874(13) | 0.1190(5) | 1.45(17) | C    |
| C2   | 1         | 0.196(2) | 0.1846(13) | 0.2010(5) | 1.45(17) | C    |
| H3   | 1         | 0.135(2) | 0.0525(13) | 0.2156(7) | 1.45(17) | H    |
| H4   | 1         | 0.066(2) | 0.2869(13) | 0.1895(7) | 1.45(17) | H    |
| C5   | 1         | 0.316(3) | 0.2247(13) | 0.2719(5) | 1.45(17) | C    |
| H6   | 1         | 0.449(3) | 0.1219(13) | 0.2809(5) | 1.45(17) | H    |
| H7   | 1         | 0.378(3) | 0.3567(13) | 0.2549(7) | 1.45(17) | H    |
| C8   | 1         | 0.160(3) | 0.2239(14) | 0.3567(5) | 1.45(17) | C    |
| H9   | 1         | 0.030(3) | 0.3298(14) | 0.3488(7) | 1.45(17) | H    |
| H10  | 1         | 0.093(3) | 0.0941(14) | 0.3730(7) | 1.45(17) | H    |
| C11  | 1         | 0.305(3) | 0.2582(15) | 0.4230(7) | 1.45(17) | C    |
| H12  | 1         | 0.368(3) | 0.3889(15) | 0.4038(7) | 1.45(17) | H    |
| H13  | 1         | 0.436(3) | 0.1529(15) | 0.4267(7) | 1.45(17) | H    |
| C14  | 1         | 0.170(4) | 0.2570(17) | 0.5116(5) | 1.45(17) | C    |
| H15  | 1         | 0.041(4) | 0.3652(17) | 0.5083(7) | 1.45(17) | H    |
| H16  | 1         | 0.101(4) | 0.1283(17) | 0.5300(5) | 1.45(17) | H    |
| C17  | 1         | 0.317(4) | 0.2842(18) | 0.5789(7) | 1.45(17) | C    |
| H18  | 1         | 0.383(4) | 0.4140(18) | 0.5612(7) | 1.45(17) | H    |
| H19  | 1         | 0.447(4) | 0.1774(18) | 0.5812(7) | 1.45(17) | H    |
| C20  | 1         | 0.166(4) | 0.276(2)   | 0.6637(7) | 1.45(17) | C    |
| H21  | 1         | 0.041(4) | 0.386(2)   | 0.6593(7) | 1.45(17) | H    |
| H22  | 1         | 0.095(4) | 0.148(2)   | 0.6771(5) | 1.45(17) | H    |
| C23  | 1         | 0.296(5) | 0.290(2)   | 0.7368(7) | 1.45(17) | C    |
| H24  | 1         | 0.427(5) | 0.183(2)   | 0.7393(7) | 1.45(17) | H    |
| H25  | 1         | 0.636(5) | 0.580(2)   | 0.2756(7) | 1.45(17) | H    |
| C26  | 1         | 0.147(5) | 0.272(2)   | 0.8230(7) | 1.45(17) | C    |

|      |   |            |           |            |          |    |
|------|---|------------|-----------|------------|----------|----|
| O27  | 1 | 0.408(3)   | 0.371(2)  | 0.0848(9)  | 1.45(17) | O  |
| O28  | 1 | 0.398(3)   | 0.036(2)  | 0.0821(10) | 1.45(17) | O  |
| O29  | 1 | 0.062(3)   | 0.724(2)  | 0.1685(9)  | 1.45(17) | O  |
| O30  | 1 | 0.267(3)   | 0.313(2)  | 0.8841(10) | 1.45(17) | O  |
| Oaq  | 1 | 0.92689    | 0.2742    | 0.03174    | 3.0(5)   | O  |
| H1ac | 1 | 0.05928    | 0.59546   | 0.00687    | 3.0(5)   | H  |
| H2ac | 1 | 0.0193     | 0.1742    | 0.99963    | 3.0(5)   | H  |
| Ca   | 1 | 0.3994(14) | 0.7251(9) | 0.0594(4)  | 1.03(15) | Ca |

**Table S3.** Bond distances for the title structure.

|        |        |           |                                                                                       |
|--------|--------|-----------|---------------------------------------------------------------------------------------|
| Ca:0   | O28:1  | 0 -1 0    | 2.222(15)                                                                             |
| O30:0  | -1 1 1 | 2.24(2)   | 81.7(7)                                                                               |
| O27:1  | 1 0 0  | 2.377(15) | 87.7(7) 160.9(6)                                                                      |
| O29:0  | 0 1 1  | 2.44(2)   | 86.7(7) 112.1(7) 82.6(7)                                                              |
| Oaq:0  | 0 1 0  | 2.577(8)  | 79.4(5) 86.3(5) 166.8(6) 107.1(6)                                                     |
| O27:0  | 0 1 0  | 2.58(2)   | 72.6(5) 148.2(6) 76.8(5) 94.5(8) 119.7(6)                                             |
| H1ac:0 | 0 1 0  | 2.588(7)  | 78.2(5) 22.13(7) 70.2(4) 66.3(5) 153.9(5) 123.8(7)                                    |
| H2ac:0 | 0 1 0  | 2.727(9)  | 34.31(11) 91.7(5) 21.27(8) 64.3(5) 99.9(6) 171.1(6) 89.7(6)                           |
| O28:0  | 0 1 0  | 2.747(15) | 89.6(5) 104.6(4) 51.1(5) 85.0(4) 141.5(7) 127.4(7) 89.3(6) 68.6(7)                    |
| C1:0   | 0 1 0  | 2.969(12) | 25.2(4) 89.2(3) 90.5(3) 26.0(3) 76.3(3) 153.2(6) 102.8(5) 93.5(6) 93.8(5)             |
| C1:0   | O28:0  | 0 0 0     | 1.265(18)                                                                             |
| O27:0  | 0 0 0  | 1.306(15) | 127.2(12)                                                                             |
| C2:0   | 0 0 0  | 1.52800   | 110.7(10) 118.7(9)                                                                    |
| H3:0   | 0 0 0  | 2.06619   | 27.045 136.3(11) 91.7(9)                                                              |
| H4:0   | 0 0 0  | 2.06655   | 45.451 26.995 91.5(12) 126.0(11)                                                      |
| C5:0   | 0 0 0  | 2.48424   | 53.435 53.501 34.785 98.6(8) 132.7(7)                                                 |
| H6:0   | 0 0 0  | 2.65962   | 21.851 73.624 59.156 50.460 108.7(7) 116.3(8)                                         |
| H7:0   | 0 0 0  | 2.66302   | 35.014 21.822 58.898 73.591 50.319 77.2(7) 151.3(8)                                   |
| Ca:0   | 0 -1 0 | 2.969(12) | 131.4(2) 142.3(3) 151.8(3) 137.3(3) 154.7(3) 164.3(3) 60.0(9) 67.5(8)                 |
| H2ac:0 | -1 0 0 | 3.026(12) | 71.8(3) 136.5(3) 145.5(2) 131.5(3) 79.4(3) 86.6(2) 97.3(3) 92.9(10) 64.5(11)          |
| Oaq:0  | -1 0 0 | 3.068(14) | 18.69(8) 83.0(3) 117.9(2) 134.1(2) 115.7(2) 62.4(2) 80.0(2) 83.6(2) 85.8(11) 82.3(11) |

**C26:0** O29:0 0 0 0 1.21(4)  
O30:0 0 0 0 1.38(2) 123.6(16)  
C23:0 0 0 0 1.51700 110.4(13) 123.3(8)  
H25:0 0 0 0 2.06503 26.937 92.4(12) 128.7(9)  
H24:0 0 0 0 2.06613 45.483 26.946 98.0(14) 137.9(9)  
C20:0 0 0 0 2.53917 51.883 51.889 33.144 143.0(13) 90.6(8)  
H22:0 0 0 0 2.70644 21.429 57.930 72.015 49.008 155.9(15) 80.2(9)  
H21:0 0 0 0 2.74258 34.095 21.134 71.224 56.453 47.892 145.7(10) 76.4(8)  
H2ac:0 0 0 -1 2.799(11) 152.0(7) 139.6(5) 160.6(6) 133.9(6) 147.4(6) 159.7(6) 55.3(8) 75.6(9)  
H1ac:0 0 0 -1 3.062(12) 30.72(12) 133.1(4) 150.6(6) 154.2(5) 151.1(6) 128.1(5) 154.9(5) 53.2(11) 70.4(9)  
H4:1 1 -1 -1 3.09(3) 64.4(4) 95.0(5) 74.2(4) 107.4(4) 93.5(3) 122.4(5) 77.0(5) 98.3(4) 85.9(11) 71.3(12)  
H3:1 0 -2 -1 3.13(3) 120.4(12) 110.5(9) 92.7(7) 72.1(3) 46.9(3) 67.9(3) 90.4(6) 118.8(4) 93.7(4) 141.9(10) 53.8(11)  
**O27:0** C1:0 0 0 0 1.306(15)  
O28:0 0 0 0 2.303(19) 25.9(7)  
C2:0 0 0 0 2.335(18) 62.5(6) 37.7(6)  
Ca:1 1 0 0 2.377(15) 124.5(10) 168.5(8) 162.3(15)  
H4:0 0 0 0 2.47(2) 106.4(9) 23.5(2) 77.5(7) 56.7(9)  
Ca:0 0 -1 0 2.58(2) 137.1(6) 103.2(5) 130.3(6) 68.2(6) 93.9(10)  
H7:0 0 0 0 2.695(17) 153.6(10) 54.7(4) 91.5(5) 47.6(3) 99.4(6) 74.5(7)  
H1ac:1 1 -1 0 2.72(2) 116.1(9) 90.3(5) 78.3(7) 60.6(5) 100.7(9) 110.7(8) 115.5(13)  
C5:0 0 0 0 2.975(17) 117.9(9) 19.30(12) 144.5(8) 43.7(3) 109.3(6) 30.0(2) 81.1(6) 55.6(6)  
Oaq:0 0 0 0 3.05(2) 106.9(7) 134.5(5) 103.1(7) 53.7(5) 146.6(8) 97.9(6) 123.3(8) 83.2(9) 95.9(14)  
O27:1 1 -1 0 3.08(3) 67.1(8) 159.3(7) 68.0(7) 140.3(7) 48.7(5) 146.2(14) 54.5(4) 168.0(12) 116.4(10) 142.4(14)  
H3:0 0 0 0 3.143(17) 160.8(9) 119.1(7) 39.7(2) 101.4(7) 58.4(3) 118.2(5) 30.13(18) 135.4(9) 12.13(11) 50.7(6) 27.0(7)

**O28:0** C1:0 0 0 0 1.265(18)

Ca:1 0 -1 0 2.222(15) 161.3(12)

O27:0 0 0 0 2.303(19) 171.8(9) 26.9(6)

C2:0 0 0 0 2.41(2) 59.4(7) 128.2(7) 33.8(6)

H3:0 0 0 0 2.45(2) 23.5(2) 82.6(8) 104.8(6) 57.3(9)

H2ac:0 -1 0 0 2.73(2) 86.6(8) 87.4(8) 83.2(8) 93.6(6) 90.8(13)

Ca:0 0 -1 0 2.747(15) 79.8(5) 141.9(8) 119.7(6) 60.6(5) 111.4(7) 87.3(7)

O28:1 0 -2 0 2.83(4) 46.9(4) 83.0(7) 164.4(10) 164.8(11) 107.5(8) 64.5(6) 134.2(10)

O30:1 1 -2 -1 2.92(3) 75.5(9) 105.5(8) 142.5(6) 106.8(7) 118.6(7) 132.4(10) 49.4(5) 126.0(13)

H4:0 0 0 0 2.99(3) 135.4(7) 149.1(11) 110.0(6) 71.2(6) 32.2(3) 17.1(2) 53.8(7) 132.2(8) 34.0(9)

O29:1 0 -2 -1 3.08(2) 80.7(6) 80.6(6) 111.6(7) 151.9(6) 79.3(6) 54.7(5) 78.0(6) 134.4(11) 51.7(5) 111.7(12)

Oaq:0 -1 0 0 3.16(2) 80.8(6) 54.0(5) 156.7(5) 98.7(8) 85.0(5) 17.50(15) 73.0(7) 70.6(7) 71.0(8) 107.5(6) 74.3(12)



**O29:0** C26:0 0 0 0 1.21(4)  
 O30:0 0 0 0 2.28(3) 30.3(8)  
 C23:0 0 0 0 2.40(3) 61.0(8) 31.9(6)  
 Ca:0 0 -1 -1 2.44(2) 172.8(8) 111.9(7) 141.4(10)  
 H3:1 0 -2 -1 2.604(16) 94.6(6) 90.7(8) 123.1(11) 104.2(13)  
 H21:0 0 0 0 2.724(17) 81.1(5) 138.8(10) 46.9(4) 104.2(9) 78.1(10)  
 H2ac:0 0 0 -1 2.759(14) 157.3(10) 106.4(5) 63.0(4) 110.9(8) 53.6(5) 79.3(9)  
 H22:0 0 0 0 2.77(2) 138.3(9) 33.8(2) 51.9(6) 140.8(8) 46.3(4) 104.6(11) 74.4(10)  
 C20:0 0 0 0 2.82(2) 20.34(15) 141.0(10) 20.44(15) 72.2(6) 154.5(9) 32.5(3) 93.5(10) 64.1(9)  
 H1ac:0 0 0 -1 2.891(14) 145.8(7) 160.8(10) 32.23(15) 143.1(5) 135.4(5) 57.4(4) 115.5(7) 56.2(6) 86.4(8)  
 H4:1 1 -1 -1 2.940(16) 68.5(4) 91.3(5) 110.1(5) 99.4(4) 77.1(5) 153.6(8) 92.0(7) 85.2(6) 77.2(6) 85.8(11)  
 H25:0 0 0 0 2.97(3) 68.1(6) 104.3(5) 41.5(4) 59.5(5) 109.2(7) 48.5(4) 107.5(7) 157.9(6) 17.4(2) 55.7(6) 32.8(7)  
 H24:0 0 0 0 3.07(3) 30.6(3) 98.4(6) 113.0(7) 40.6(4) 47.7(5) 100.5(7) 58.6(5) 82.6(7) 161.9(8) 15.5(2) 56.8(8) 26.8(6)  
 O28:1 0 -2 -1 3.08(2) 125.4(8) 155.5(9) 136.3(10) 90.6(5) 121.7(6) 101.6(6) 73.6(4) 124.4(7) 50.3(5) 45.7(5) 138.1(9) 123.3(7) 132.5(13)  
 H7:1 1 -1 -1 3.16(2) 105.1(8) 117.8(5) 91.9(6) 45.8(3) 98.7(6) 84.3(6) 92.5(6) 129.1(7) 63.9(7) 110.5(7) 80.0(7) 102.6(6) 122.7(6) 122.2(10)

**O30:0** C26:0 0 0 0 1.38(2)  
Ca:0 1 -1 -1 2.24(2) 148.4(18)  
O29:0 0 0 0 2.28(3) 167.4(9) 26.2(12)  
H2ac:0 0 0 -1 2.310(17) 73.9(7) 101.1(6) 95.4(12)  
C23:0 0 0 0 2.378(18) 130.3(8) 62.0(9) 116.8(12) 36.7(6)  
H1ac:0 0 0 -1 2.49(2) 133.8(11) 38.0(3) 74.4(8) 109.1(6) 100.5(15)  
H25:0 0 0 0 2.53(2) 134.4(10) 23.01(19) 149.8(9) 76.2(8) 107.3(10) 54.7(7)  
H24:0 0 0 0 2.64(2) 35.9(3) 151.2(9) 22.0(2) 129.8(7) 76.9(8) 98.7(10) 50.8(8)  
Oaq:0 0 0 -1 2.85(2) 145.3(7) 148.8(11) 19.94(14) 138.1(10) 18.53(18) 76.3(7) 102.8(6) 101.4(14)  
O28:1 1 -2 -1 2.92(3) 104.0(6) 70.9(7) 101.9(9) 122.7(7) 92.7(9) 88.9(6) 118.8(7) 48.8(5) 105.4(13)  
H1ac:1 2 -1 -1 3.03(2) 126.7(6) 47.2(3) 160.1(7) 124.2(7) 32.2(2) 139.9(9) 65.2(5) 98.6(10) 89.5(5) 121.9(16)

**Oaq:0** H2ac:0 0 0 0 0.99019  
H1ac:0 0 0 0 0.99166 105.099  
H1ac:1 2 -1 0 2.36485 32.372 116.496  
Ca:0 0 -1 0 2.577(8) 109.80(12) 79.56(11) 87.93(19)  
H4:0 1 0 0 2.794(10) 149.6(4) 78.56(16) 110.58(16) 115.1(3)  
O30:0 0 0 1 2.85(2) 118.1(4) 91.9(4) 70.4(3) 59.1(4) 47.9(3)  
O27:0 0 0 0 3.05(2) 140.8(5) 96.4(4) 53.7(3) 101.5(2) 93.0(3) 133.9(2)  
C1:0 1 0 0 3.068(14) 137.0(3) 80.5(4) 40.95(17) 166.1(3) 78.73(14) 105.88(14) 78.3(2)  
O28:0 1 0 0 3.16(2) 23.4(3) 147.1(4) 71.5(5) 60.0(4) 142.8(3) 96.0(2) 115.9(2) 56.0(3)  
H2ac:1 1 -2 0 3.16731 67.4(2) 89.72(16) 104.9(2) 81.6(3) 109.67(19) 77.58(15) 151.025 133.360 34.568

**H1ac:0** Oaq:0 0 0 0 0.99166

H2ac:0 0 0 0 1.57335 37.418

H1ac:1 2 -1 0 1.61696 134.595 128.458

Oaq:1 2 -1 0 2.36485 19.169 144.400 147.628

O30:0 0 0 1 2.49(2) 87.2(3) 92.6(3) 64.6(3) 101.0(4)

Ca:0 0 -1 0 2.588(7) 100.5(4) 131.37(15) 147.39(17) 77.69(18) 78.31(13)

O27:1 1 -1 0 2.72(2) 53.1(3) 110.2(6) 79.0(3) 94.3(3) 129.6(3) 125.4(3)

O29:0 0 0 1 2.891(14) 72.1(6) 52.4(4) 49.4(6) 109.5(2) 125.9(2) 69.2(3) 99.2(3)

H2ac:1 2 -1 0 2.94319 120.8(3) 72.6(3) 125.22(17) 104.7(3) 17.524 22.375 156.970 140.019

O30:1 2 -1 -1 3.03(2) 45.4(3) 148.0(6) 75.9(5) 107.4(4) 147.8(2) 62.4(3) 55.2(3) 136.6(3) 100.1(3)

C26:0 0 0 1 3.062(12) 158.1(4) 114.8(3) 23.1(7) 89.5(6) 75.0(5) 26.3(6) 99.1(4) 110.9(4) 65.3(3) 101.8(3)

**H2ac:0** Oaq:0 0 0 0 0.99019

H1ac:0 0 0 0 1.57335 37.483

O30:0 0 0 1 2.310(17) 77.4(5) 113.6(5)

H2ac:1 1 -2 0 2.41810 113.0(4) 157.026 131.997

Ca:0 0 -1 0 2.727(9) 89.46(11) 101.4(5) 68.00(11) 70.80(14)

O28:0 1 0 0 2.73(2) 170.2(3) 85.6(3) 88.3(6) 115.9(3) 106.5(4)

O29:0 0 0 1 2.759(14) 135.8(6) 52.7(5) 91.6(3) 52.5(6) 78.5(4) 107.8(4)

C26:0 0 0 1 2.799(11) 25.1(7) 111.3(7) 77.6(6) 95.9(3) 29.4(6) 83.9(3) 120.2(3)

H1ac:1 2 -1 0 2.94319 86.6(3) 90.6(3) 93.6(3) 90.94(11) 177.477 69.4(4) 23.030 45.981

C1:0 1 0 0 3.026(12) 71.50(17) 119.3(7) 143.2(4) 24.7(4) 153.7(3) 107.26(16) 90.7(5) 92.55(19) 83.0(2)

Oaq:1 1 -2 0 3.16731 105.34(19) 168.511 85.5(3) 85.7(3) 81.6(3) 95.49(12) 13.435 100.0(4) 161.986 145.432

**Table S4.** BVS and GII calculated for Ca and coordinating oxygen atoms

BVS parameters were computed both manually and using software as EXPO and VESTA: all calculation methods gave very similar results (a). Noteworthy, manual calculations allowed to perform the bond valence sum method using different bond-valence parameters (bu, bt, bs, o) as detailed in the below reported table.

Computation was performed using bvparm2020.cif: 2020 version

| Atom | Atom  | Refined distances | Sij           | a               | bu              | bt              | bs              | o               |
|------|-------|-------------------|---------------|-----------------|-----------------|-----------------|-----------------|-----------------|
| Ca   | O28:1 | 2.22              |               | 0.504704        | 0.456675        | 0.460393        | 0.465203        | 0.453734        |
|      | O30:0 | 2.24              |               | 0.478147        | 0.432645        | 0.436167        | 0.443002        | 0.432132        |
|      | O27:1 | 2.38              |               | 0.327517        | 0.296349        | 0.298762        | 0.314592        | 0.307129        |
|      | O29:0 | 2.44              |               | 0.278489        | 0.251987        | 0.254038        | 0.271667        | 0.265317        |
|      | O27:0 | 2.58              |               | 0.190757        | 0.172604        | 0.174009        | 0.192921        | 0.188569        |
|      | O28:0 | 2.75              |               | 0.120487        | 0.109021        | 0.109908        | 0.127311        | 0.124565        |
|      | Oaq:0 | 2.58              |               | 0.190757        | 0.172604        | 0.174009        | 0.192921        | 0.188569        |
|      |       |                   | <b>V Ca</b>   | <b>2.090856</b> | <b>1.891884</b> | <b>1.907286</b> | <b>2.007616</b> | <b>1.960015</b> |
|      |       |                   | <b>G Ca-O</b> | <b>0.090856</b> | <b>0.108116</b> | <b>0.092714</b> | <b>0.007616</b> | <b>0.039985</b> |

Source of used parameters

a from <https://scripts.iucr.org/cgi-bin/paper?S0108768185002063> access on 1 February 2023

bu from <http://scripts.iucr.org/cgi-bin/paper?S2059798317000584> access on 1 February 2023

bt from <https://www.sciencedirect.com/science/article/abs/pii/S0022459618305188> access on 1 February 2023

bs from <https://scripts.iucr.org/cgi-bin/paper?yb5007> access on 1 February 2023

o from <https://link.springer.com/article/10.1007/BF00902183> access on 1 February 2023

<https://www.iucr.org/resources/data/datasets/bond-valence-parameters>

<https://www.ba.ic.cnr.it/softwareic/expo/bond-valence-sum/>
